# Supplementary material for: GATA-1 Defects in Diamond–Blackfan Anemia: Phenotypic Characterization Points to a Specific Subset of Disease
Source: MDPI journal article supplement (doi:10.3390/genes13030447), 2022-02-28

## Supplementary File S1. In silico predictions

### **GATA1 gene (Xq11.23):**

NM\_002049.4

#### **Patient 1.**

**GATA1 c.220+2T>C; p.?**

intron 2

Splicing site mutation

Position 48791331

**gnomAD: 0**

**Class 5 pathogenic** according to ACMG-AMP (Richards et al., Genet Med 2015 ; Amendola et al., Am J Hum Genet 2016).

No publications about this variation; no metascoring; no clinVar description

**CADD= 26.4**

PHRED=26.4

Rawscore: 3.91

Varsome data:

**Individual predictions:** bayesDel addAF=damaging; bayesDel noAF= damaging

FATHMM-MKL= damaging

Mutation taster disease causing

#### **Patient 2.**

**GATA1 c.2T>C; p.(Met1Thr)**

exon 2

start loss allelic variation

position 48791111

rs587776451

**gnomAD=0**

**Class 5 pathogenic** according to ACMG-AMP (Richards et al., Genet Med 2015 ; Amendola et al., Am J Hum Genet 2016).

**4 publications:** Bluteau et al, Blood; Ludwig LS et al., Nature med 2014; Parrella et al., S J Pediatr Blood and Cancer; Kanezaki et al., Blood

**Clinvar: pathogenic** RCV001382885, RCV000144252, RCV000754842

**CADD=21.9**

PHRED=21.9

Rawscore=2.35

Metascore: 4/4:

METALR=0.8322 damaging;

METASVM=0.5822 Damaging;

METARNN=0.8873 Damaging;

**Revel=0.56 pathogenic**

**Individual predictions** = 11/12 damaging

Bayesdel addAF score 0.7434 damaging;

Bayesdel noAF score 0.8299 damaging;

mutation taster disease causing;

**sift/sift4G score 0 damaging**

Electropherogram of **GATA1 c.220+2T>C**; p.?

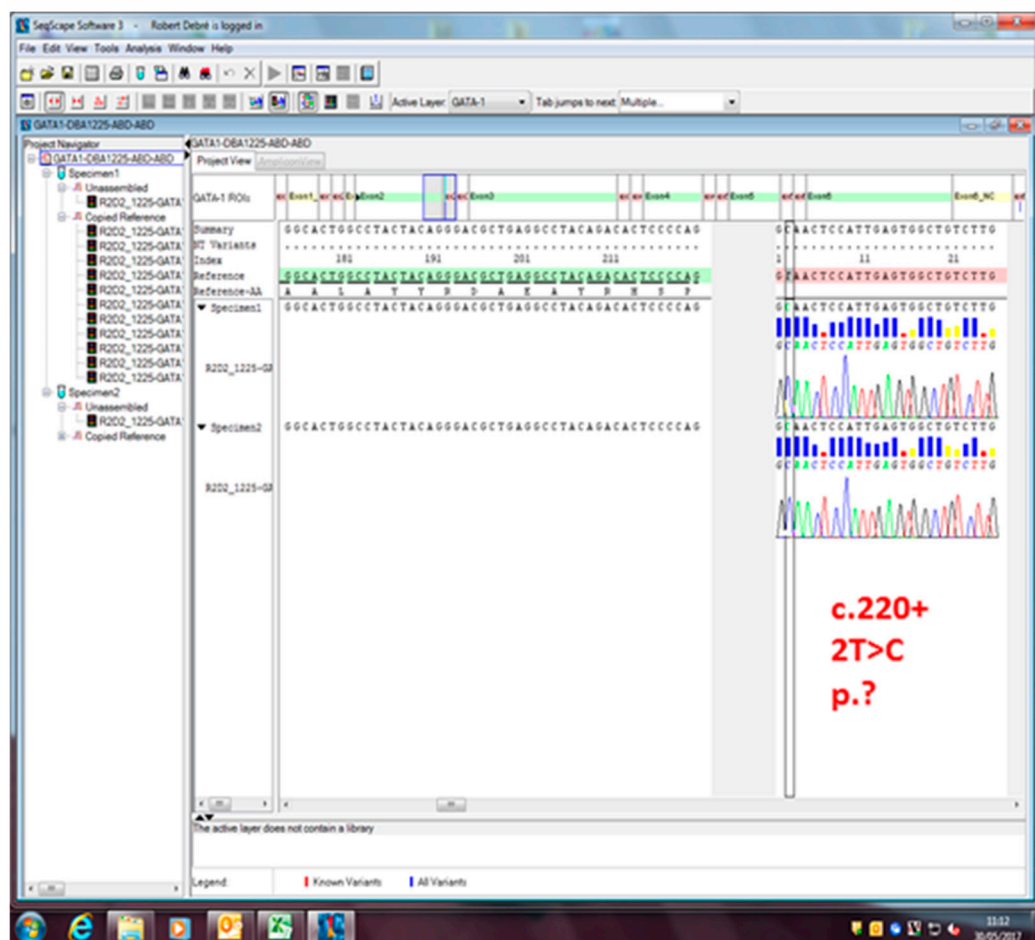

Supplement: s1 [file s1]
